# Supplementary material for: Electrochemical, spectroscopic and theoretical monitoring of anthracyclines’ interactions with DNA and ascorbic acid by adopting two routes: Cancer cell line studies
Source: PubMed Central journal article supplement (PMC6205586; doi:10.1371/journal.pone.0205764), 2018-10-29
Supplement: pone.0205764.s002.pdf [file pone.0205764.s002.pdf]

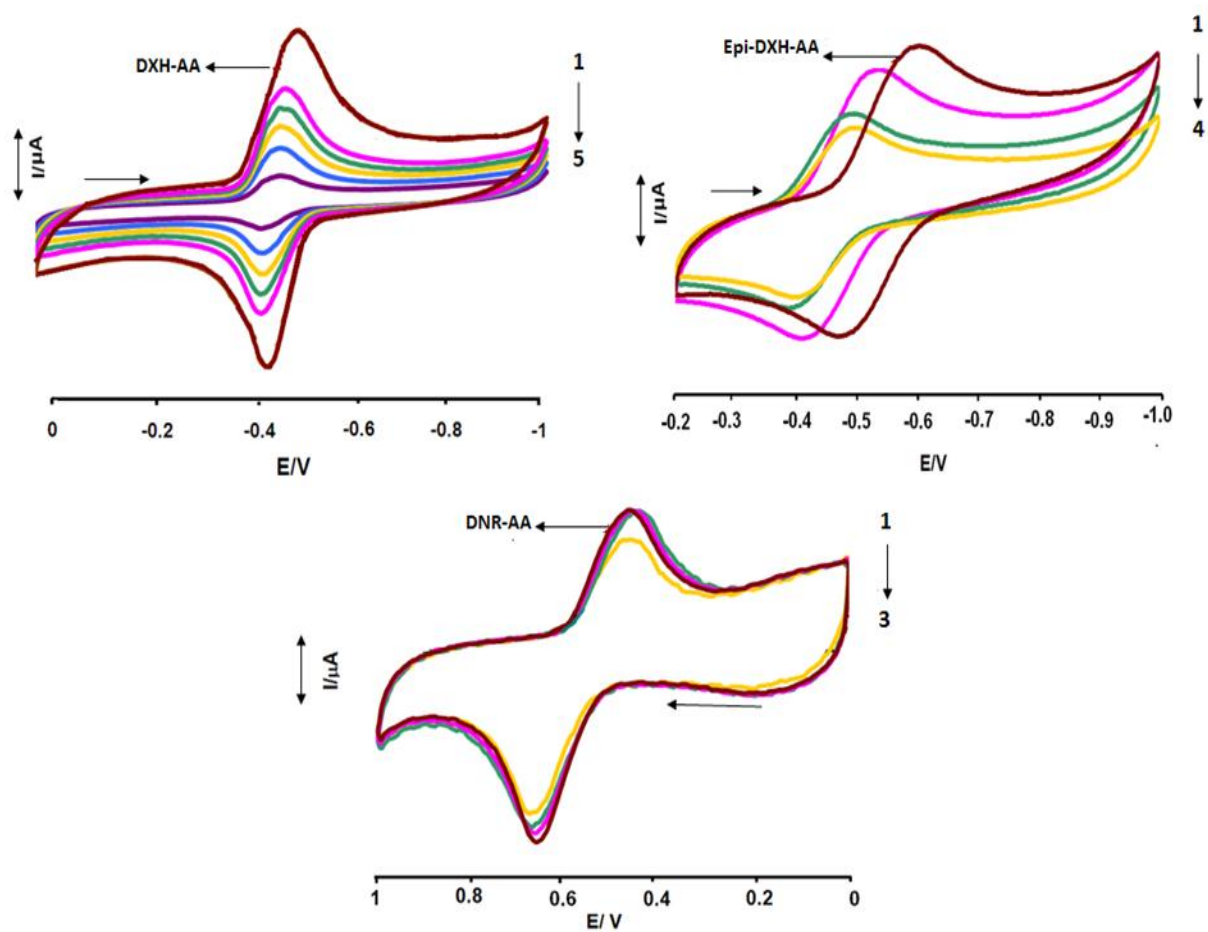

**S2 Fig.** CV behavior of AA–anthracycline adducts in the absence and presence of varying DNA concentrations. Arrow direction indicated the increasing concentrations of DNA. pH = 4.7, T=309.5K.
