# Supplementary material for: Electrochemical, spectroscopic and theoretical monitoring of anthracyclines’ interactions with DNA and ascorbic acid by adopting two routes: Cancer cell line studies
Source: PubMed Central journal article supplement (PMC6205586; doi:10.1371/journal.pone.0205764), 2018-10-29
Supplement: pone.0205764.s004.pdf [file pone.0205764.s004.pdf]

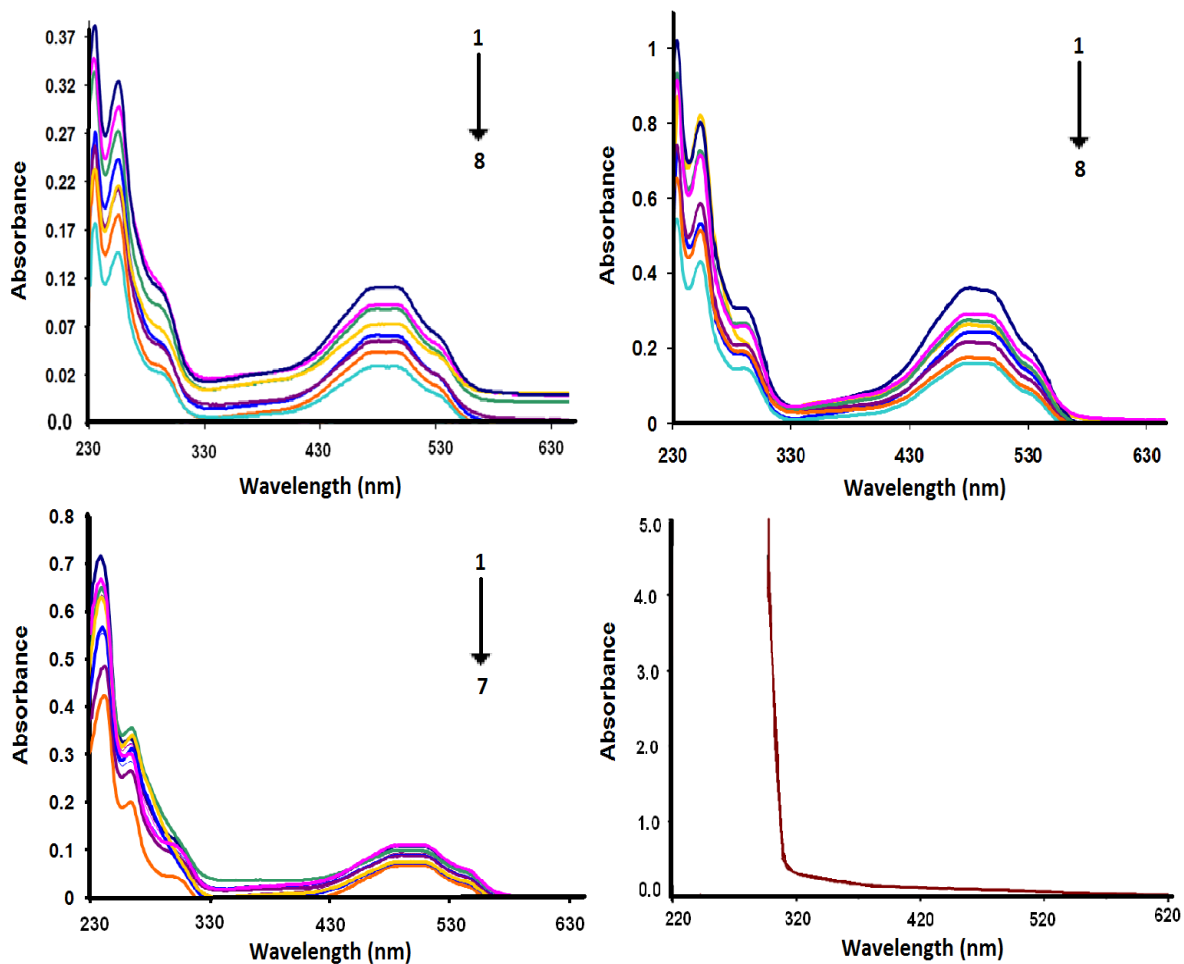

**S4 Fig.** UV-Visible signatures for the interaction in McIlvaine buffer between DNA and 5.0 $\mu$ M of (A) DXH (B) Epi-DXH (C) DNR and (D) AA.  $\{C_{DNA}=0, 2\mu$ M, 2.5 $\mu$ M, 3 $\mu$ M, 3.5 $\mu$ M, 4.0 $\mu$ M, 4.5  $\mu$ M; 5.0  $\mu$ M. Arrow direction indicated the increasing concentrations of DNA, pH =4.7, T=309.5K}.
