# Supplementary material for: Electrochemical, spectroscopic and theoretical monitoring of anthracyclines’ interactions with DNA and ascorbic acid by adopting two routes: Cancer cell line studies
Source: PubMed Central journal article supplement (PMC6205586; doi:10.1371/journal.pone.0205764), 2018-10-29
Supplement: pone.0205764.s005.pdf [file pone.0205764.s005.pdf]

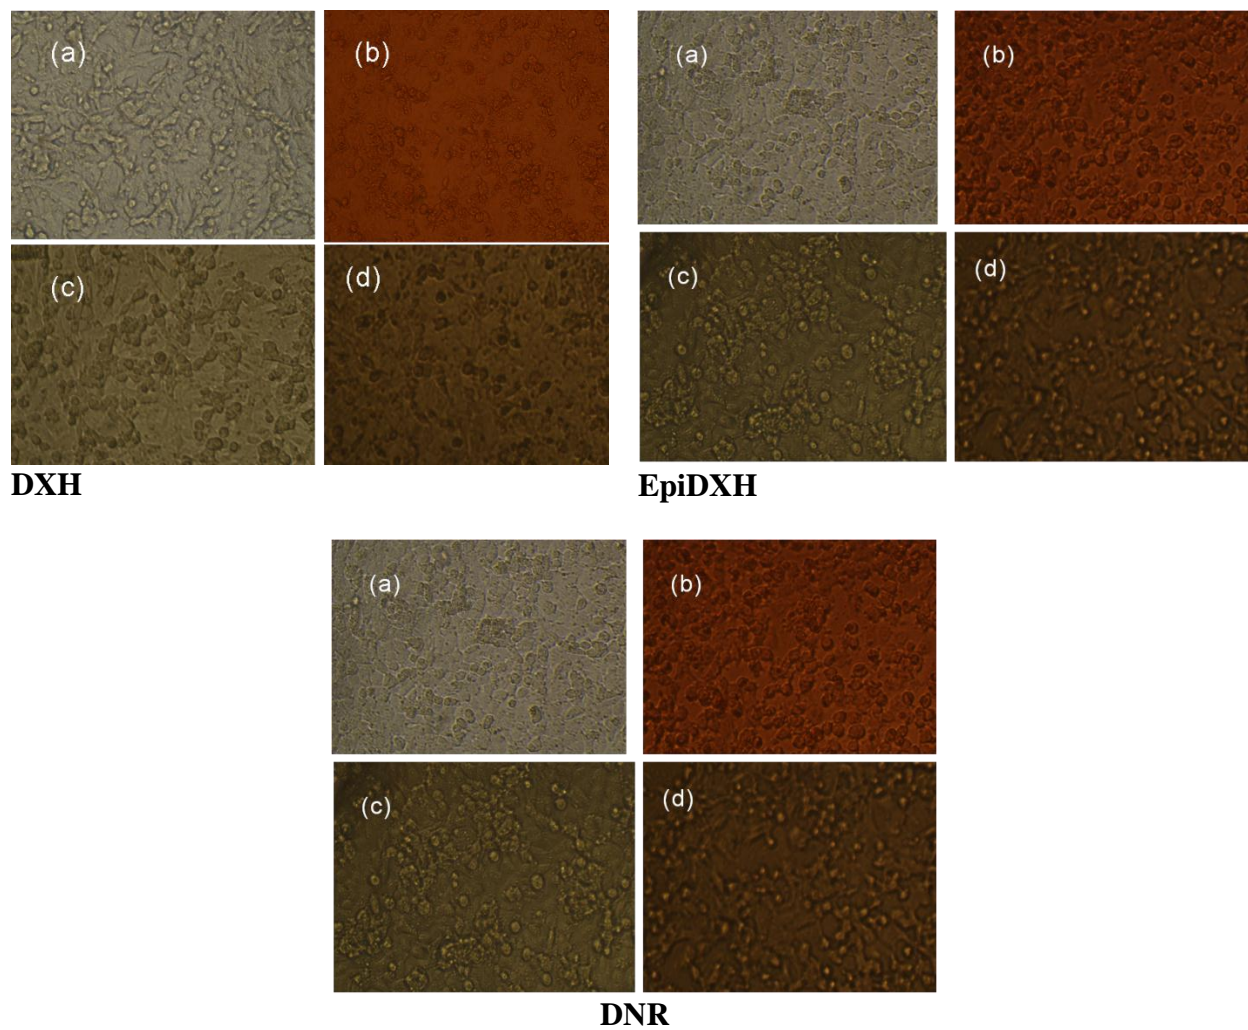

**S5 Fig.** (a) Control for cell line H-1299, (b) Intracellular drug distribution (2mM drug) and drug-induced cell damage, (c) Intracellular AA distribution (2mM AA) and AA induced cell damage, (d) Intracellular drug distribution (IC<sub>50</sub>coadministerd with 2mM AA) and drug-induced cell damage
