# Supplementary material for: Electrochemical, spectroscopic and theoretical monitoring of anthracyclines’ interactions with DNA and ascorbic acid by adopting two routes: Cancer cell line studies
Source: PubMed Central journal article supplement (PMC6205586; doi:10.1371/journal.pone.0205764), 2018-10-29
Supplement: pone.0205764.s006.pdf [file pone.0205764.s006.pdf]

**S1 Table.**Electrochemical parameters of DXH, EpiDXH and DNR in the absence and presence of different concentrations of DNA at pH 7.4 and 4.7{buffer: 0.12M McIlvainesolution,Temp: 309.5K, Scan rate:0.1V/s.

| pH 7.4       |                |                |                 |                 |                               |                    | pH 4.7       |                |                |                 |                 |                               |                    |
|--------------|----------------|----------------|-----------------|-----------------|-------------------------------|--------------------|--------------|----------------|----------------|-----------------|-----------------|-------------------------------|--------------------|
| DXH–DNA      |                |                |                 |                 |                               |                    |              |                |                |                 |                 |                               |                    |
| [DNA]<br>/μM | $E_p^c$ /<br>V | $E_p^a$ /<br>V | $i_p^c$ /μ<br>A | $i_p^a$ /μ<br>A | $E_p^c$ -<br>$E_{p/2}$ /<br>V | $E_{1/2}^c$ /<br>V | [DNA]<br>/μM | $E_p^c$ /<br>V | $E_p^a$ /<br>V | $i_p^c$ /μ<br>A | $i_p^a$ /μ<br>A | $E_p^c$ -<br>$E_{p/2}$ /<br>V | $E_{1/2}^c$ /<br>V |
| 0            | -0.56          | -0.52          | 5.82            | 4.99            | 0.060                         | -0.54              | 0            | -0.50          | -0.45          | 8.03            | 7.29            | 0.060                         | -0.49              |
| 2.0          | -0.54          | -0.50          | 5.12            | 4.63            | 0.060                         | -0.52              | 2.0          | -0.49          | -0.41          | 7.19            | 6.90            | 0.060                         | -0.47              |
| 2.5          | -0.52          | -0.48          | 3.42            | 3.82            | 0.059                         | -0.50              | 2.5          | -0.47          | -0.38          | 6.81            | 5.75            | 0.058                         | -0.42              |
| 3.0          | -0.50          | -0.46          | 4.34            | 2.92            | 0.060                         | -0.48              | 3.0          | -0.42          | -0.36          | 6.02            | 4.89            | 0.045                         | -0.39              |
| 3.5          | -0.48          | -0.44          | 4.25            | 2.89            | 0.060                         | -0.46              | 3.5          | -0.39          | -0.36          | 5.63            | 4.45            | 0.049                         | -0.36              |
| 4.0          | -0.46          | -0.42          | 3.23            | 1.80            | 0.060                         | -0.44              | 4.0          | -0.35          | -0.34          | 5.15            | 3.99            | 0.051                         | -0.31              |
| 4.5          | -0.45          | -0.42          | 2.52            | 0.72            | 0.060                         | -0.43              | 4.5          | -0.32          | -0.31          | 5.15            | 3.99            | 0.051                         | -0.30              |
| EpiDXH–DNA   |                |                |                 |                 |                               |                    |              |                |                |                 |                 |                               |                    |
| 0            | -0.62          | -0.45          | 4.31            | 4.26            | 0.090                         | -0.54              | 0            | -0.60          | -0.47          | 4.58            | 4.11            | 0.053                         | -0.54              |
| 2.0          | -0.57          | -0.45          | 3.69            | 3.75            | 0.074                         | -0.51              | 2.0          | -0.57          | -0.45          | 3.91            | 3.24            | 0.059                         | -0.42              |
| 2.5          | -0.43          | -0.37          | 2.99            | 2.95            | 0.068                         | -0.40              | 2.5          | -0.54          | -0.45          | 2.99            | 2.95            | 0.050                         | -0.50              |
| 3.0          | -0.43          | -0.40          | 2.92            | 2.82            | 0.067                         | -0.41              | 3.0          | -0.52          | -0.43          | 1.82            | 1.95            | 0.050                         | -0.49              |
| 3.5          | -0.43          | -0.43          | 0.97            | 0.94            | 0.068                         | -0.43              | 3.5          | -0.49          | -0.43          | 1.53            | 1.33            | 0.050                         | -0.45              |
| DNR–DNA      |                |                |                 |                 |                               |                    |              |                |                |                 |                 |                               |                    |
| 0            | 0.70           | 0.40           | 2.02            | 2.40            | 0.094                         | 0.55               | 0            | 0.38           | 0.15           | 1.27            | 1.11            | 0.074                         | 0.27               |
| 2.0          | 0.73           | 0.49           | 2.33            | 2.89            | 0.071                         | 0.61               | 2.0          | 0.47           | 0.31           | 1.82            | -2.00           | 0.103                         | 0.36               |
| 2.5          | 0.75           | 0.51           | 2.26            | 2.76            | 0.078                         | 0.63               | 2.5          | 0.47           | p.d            | 1.74            | p.d             | 0.110                         | 0.36               |
| 3.0          | 0.75           | 0.50           | 2.09            | 1.97            | 0.078                         | 0.63               | p.d          | p.d            | p.d            | p.d             | p.d             | p.d                           | p.d                |
| 3.5          | 0.76           | 0.50           | 1.47            | 1.33            | 0.064                         | 0.63               | p.d          | p.d            | p.d            | p.d             | p.d             | p.d                           | p.d                |

p.d – Peak disappeared
