# Supplementary material for: Electrochemical, spectroscopic and theoretical monitoring of anthracyclines’ interactions with DNA and ascorbic acid by adopting two routes: Cancer cell line studies
Source: PubMed Central journal article supplement (PMC6205586; doi:10.1371/journal.pone.0205764), 2018-10-29
Supplement: pone.0205764.s007.pdf [file pone.0205764.s007.pdf]

**S2 Table.** Electrochemical parameters of DXH-AA, EPiDEX-AA and DNR-AA in the absence and presence of different concentrations of DNA at pH 7.4 and 4.7. {buffer: 0.12M McIlvaine solution, Temp: 309.5K, Scan rate: 0.1V/s.

| pH 7.4        |                |                |                 |                 |                           |                    | pH 4.7       |                |                |                 |                 |                               |                    |
|---------------|----------------|----------------|-----------------|-----------------|---------------------------|--------------------|--------------|----------------|----------------|-----------------|-----------------|-------------------------------|--------------------|
| DXH-AA-DNA    |                |                |                 |                 |                           |                    |              |                |                |                 |                 |                               |                    |
| [DNA]<br>/μM  | $E_p^c$ /<br>V | $E_p^a$ /<br>V | $i_p^c$ /μ<br>A | $i_p^a$ /<br>μA | $E_p^c$ -<br>$E_{p/2}$ /V | $E_{1/2}^c$ /<br>V | [DNA]<br>/μM | $E_p^c$ /<br>V | $E_p^a$ /<br>V | $i_p^c$ /μ<br>A | $i_p^a$ /μ<br>A | $E_p^c$ -<br>$E_{p/2}$ /<br>V | $E_{1/2}^c$ /<br>V |
| 0             | -0.57          | -0.53          | 3.42            | 2.92            | -0.052                    | -0.55              | 0            | -0.50          | -0.45          | 8.03            | 7.29            | 0.060                         | -0.48              |
| 2.0           | -0.57          | -0.53          | 2.14            | 1.70            | -0.054                    | -0.55              | 2.0          | -0.48          | -0.43          | 7.00            | 7.00            | 0.059                         | -0.46              |
| 2.5           | -0.56          | -0.52          | 2.00            | 2.11            | -0.054                    | -0.54              | 2.5          | -0.48          | -0.43          | 6.10            | 6.99            | 0.059                         | -0.46              |
| 3.0           | -0.55          | -0.51          | 1.61            | 4.98            | -0.054                    | -0.53              | 3.0          | -0.48          | -0.43          | 6.61            | 6.87            | 0.059                         | -0.46              |
| 3.5           | -0.56          | -0.52          | 1.48            | 5.02            | -0.054                    | -0.54              | 3.5          | -0.48          | -0.43          | 5.58            | 5.80            | 0.059                         | -0.46              |
|               |                |                |                 |                 |                           |                    | 4.0          | -0.48          | -0.43          | 4.70            | 4.91            | 0.059                         | -0.46              |
| EpiDXH-AA-DNA |                |                |                 |                 |                           |                    |              |                |                |                 |                 |                               |                    |
| 0             | -0.65          | -0.48          | 4.64            | 4.61            | 0.075                     | -0.57              | 0            | -0.58          | -0.47          | 4.31            | 4.26            | 0.06                          | -0.54              |
| 2.0           | -0.59          | -0.52          | 3.69            | 3.75            | 0.067                     | -0.55              | 2.0          | -0.47          | -0.42          | 3.69            | 3.75            | 0.067                         | -0.46              |
| 2.5           | -0.59          | -0.52          | 2.95            | 2.99            | 0.074                     | -0.55              | 2.5          | -0.45          | -0.39          | 2.95            | 2.99            | 0.074                         | -0.42              |
| 3.0           | -0.59          | -0.52          | 2.73            | 2.81            | 0.068                     | -0.55              | 3.0          | -0.45          | -0.39          | 2.73            | 2.81            | 0.068                         | -0.42              |
| DNR-AA-DNA    |                |                |                 |                 |                           |                    |              |                |                |                 |                 |                               |                    |
| 0             | 0.66           | 0.47           | 2.33            | 2.89            | 0.084                     | 0.55               | 0            | 0.39           | 0.27           | 3.86            | 3.41            | 0.040                         | 0.33               |
| 2.0           | 0.64           | 0.46           | 2.12            | 2.84            | 0.082                     | 0.55               | 2.0          | 0.36           | 0.33           | 4.64            | 2.21            | 0.035                         | 0.34               |
| 2.5           | 0.64           | 0.45           | 1.97            | 2.79            | 0.071                     | 0.55               | 2.5          | 0.38           | 0.35           | 3.75            | 2.85            | 0.039                         | 0.35               |
| 3.0           | 0.64           | 0.44           | 2.26            | 2.76            | 0.078                     | 0.55               | 3.0          | 0.38           | 0.33           | 3.30            | 2.07            | 0.039                         | 0.34               |
| 3.5           | 0.63           | 0.44           | 2.09            | 1.97            | 0.078                     | 0.54               | 3.5          | 0.38           | 0.33           | 3.18            | 1.68            | 0.040                         | 0.34               |
