# Supplementary material for: Electrochemical, spectroscopic and theoretical monitoring of anthracyclines’ interactions with DNA and ascorbic acid by adopting two routes: Cancer cell line studies
Source: PubMed Central journal article supplement (PMC6205586; doi:10.1371/journal.pone.0205764), 2018-10-29
Supplement: pone.0205764.s008.pdf [file pone.0205764.s008.pdf]

**S3 Table.** Binding parameters obtained from Cyclic Voltammetric and UV-Vis spectroscopic studies at pH 4.7 and T=309.5K

| complexes                  | Cyclic Voltammetric        |                        | Experimental                |                            | UV-Vis spectroscopic   |  |
|----------------------------|----------------------------|------------------------|-----------------------------|----------------------------|------------------------|--|
|                            | $K_b/M^1$<br>$\times 10^5$ | $-\Delta G/kJmol^{-1}$ | Binding site size<br>(s)/bp | $K_b/M^1$<br>$\times 10^5$ | $-\Delta G/kJmol^{-1}$ |  |
| Binary complexes           |                            |                        |                             |                            |                        |  |
| AA-DNA                     | 1.31                       | 30.31                  | 2.00                        | 0.02                       | 19.55                  |  |
| DXH-DNA                    | 3.30                       | 32.61                  | 1.60                        | 0.17                       | 25.06                  |  |
| EpiDXH-DNA                 | 0.45                       | 27.57                  | 1.31                        | 0.14                       | 24.56                  |  |
| DNR-DNA                    | 19.2                       | 37.22                  | 1.51                        | 11.8                       | 35.97                  |  |
| Binary complexes           |                            |                        |                             |                            |                        |  |
| DXH-AA                     | 0.083                      | 23.22                  | ----                        | 0.74                       | 32.99                  |  |
| EpiDXH-AA                  | 0.001                      | 11.19                  | ----                        | 0.013                      | 17.77                  |  |
| DNR-AA                     | 0.005                      | 21.76                  | ----                        | 0.02                       | 19.68                  |  |
| Route-1 Tertiary complexes |                            |                        |                             |                            |                        |  |
| DXH-AA-DNA                 | 1.15                       | 30.19                  | 0.58                        | 2.51                       | 31.99                  |  |
| EpiDXH-AA-DNA              | 1.75                       | 31.06                  | 0.50                        | 2.75                       | 32.23                  |  |
| DNR-AA-DNA                 | 21.1                       | 37.47                  | 2.14                        | 2.13                       | 31.57                  |  |
| Route-2 Tertiary complexes |                            |                        |                             |                            |                        |  |
| DXH-DNA-AA                 | 0.93                       | 29.43                  | 0.37                        | 1.17                       | 30.02                  |  |
| EpiDXH-DNA-AA              | 1.01                       | 29.65                  | 0.19                        | 1.03                       | 29.7                   |  |
| DNR-DNA-AA                 | 7.32                       | 34.74                  | 0.22                        | 1.14                       | 29.96                  |  |
