# Supplementary material for: Electrochemical, spectroscopic and theoretical monitoring of anthracyclines’ interactions with DNA and ascorbic acid by adopting two routes: Cancer cell line studies
Source: PLOS journal article supplement (doi:10.1371/journal.pone.0205764), 2018-10-29
Supplement: S1 (10.1371/journal.pone.0205764.s001) [file journal.pone.0205764.s001]

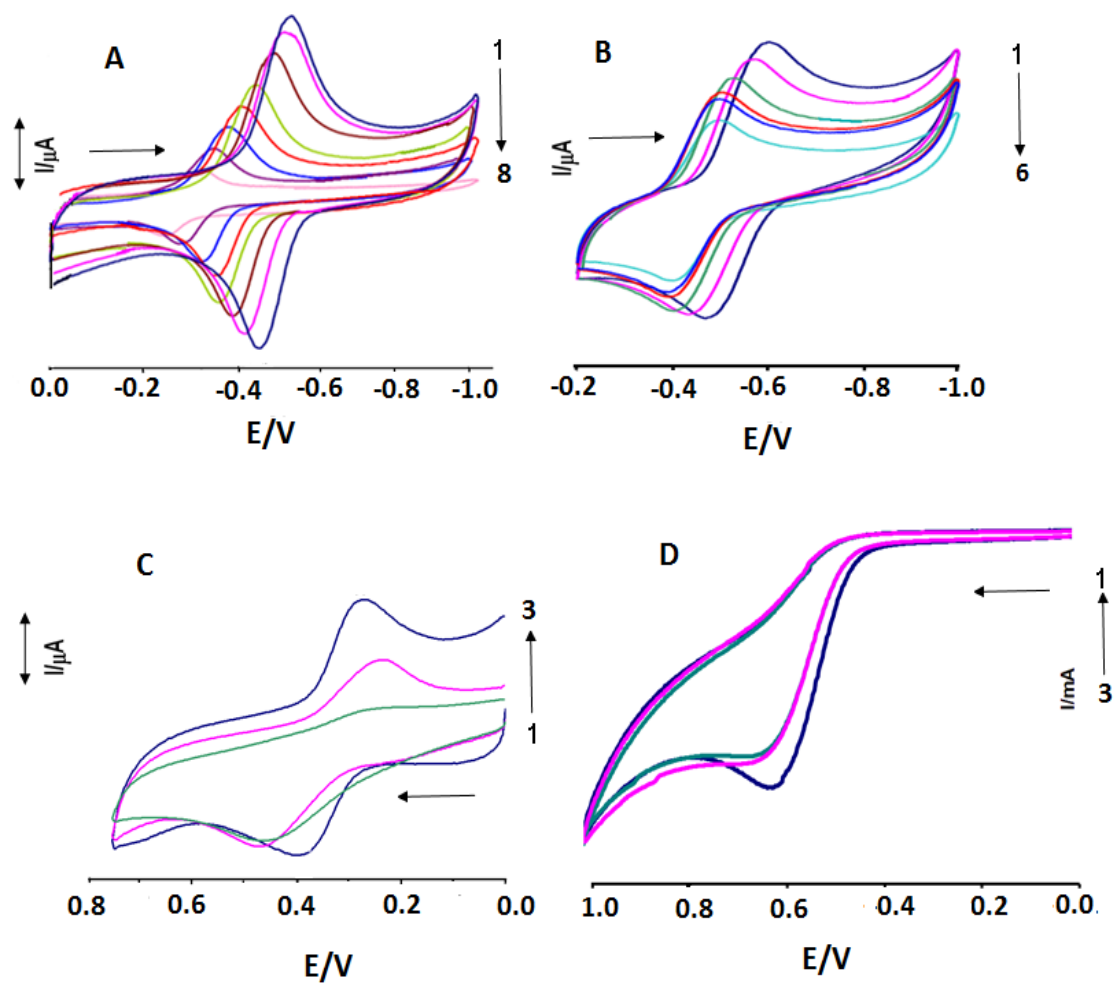

**S1 Fig.** CV behavior of the interaction in McIlvaine buffer between DNA and 5.0 $\mu\text{M}$  of (A) DXH (B) Epi-DXH (C) DNR and (D) AA. {  $C_{\text{DNA}}=0, 2\mu\text{M}, 2.5\mu\text{M}, 3\mu\text{M}, 3.5\mu\text{M}, 4.0\mu\text{M}, 4.5\mu\text{M}$ ; arrow direction indicated the increasing concentrations of DNA, pH =4.7, T=309.5K }
